# Supplementary material
Source: PubMed Central journal article supplement (PMC4542276)

SUPPLEMENTARY DATA

**Supplementary Figure 1.** Correlation between change in HbA1c and change in body weight at 90 weeks. Linear fit and 95% confidence intervals are depicted.

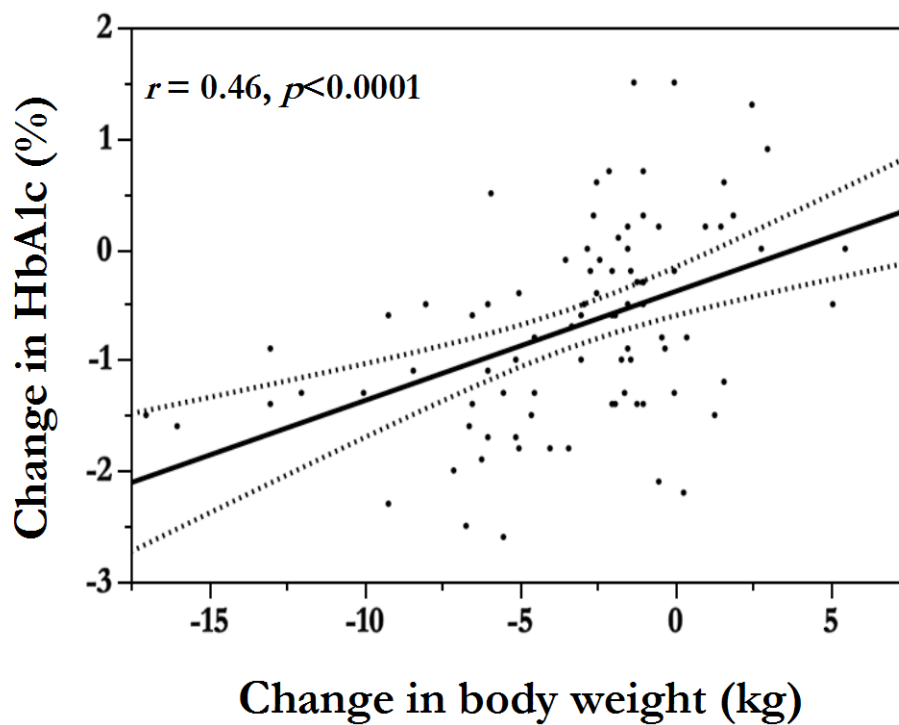

SUPPLEMENTARY DATA

**Supplementary Figure 2.** Total daily energy expenditure (TDEE) in men and women with type 2 diabetes treated with empagliflozin (25 mg/day) for 90 weeks. The observed values (repeated from Figure 3) are contrasted with those (*dotted line and shaded area, mean±SEM*) that would be obtained if the same calorie deficit as produced by glycosuria had been achieved by restriction of calorie intake.

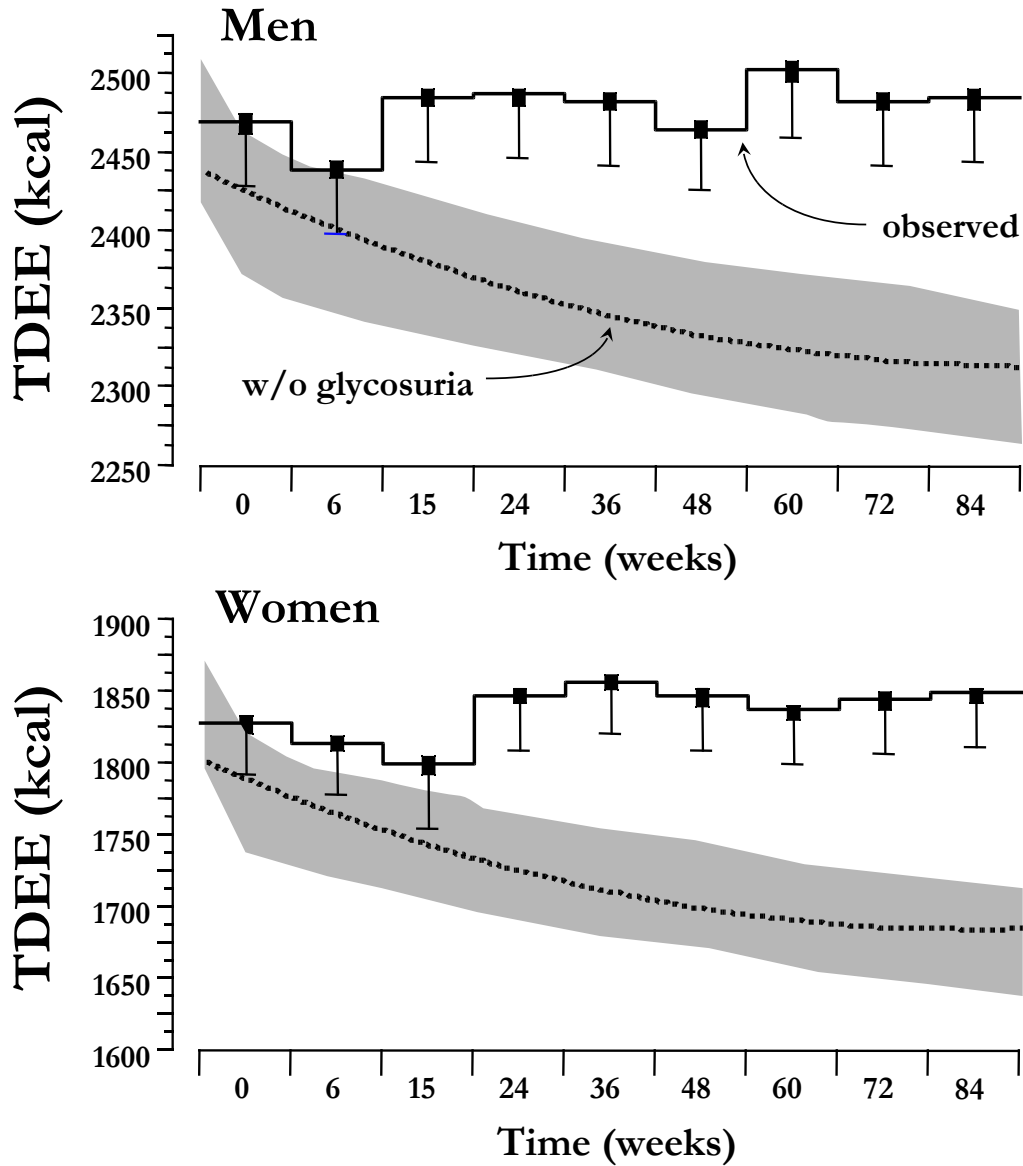

SUPPLEMENTARY DATA

**Supplementary Figure 3.** Simultaneous dependence of the difference between expected and observed total daily energy expenditure on baseline BMI and eGFR.

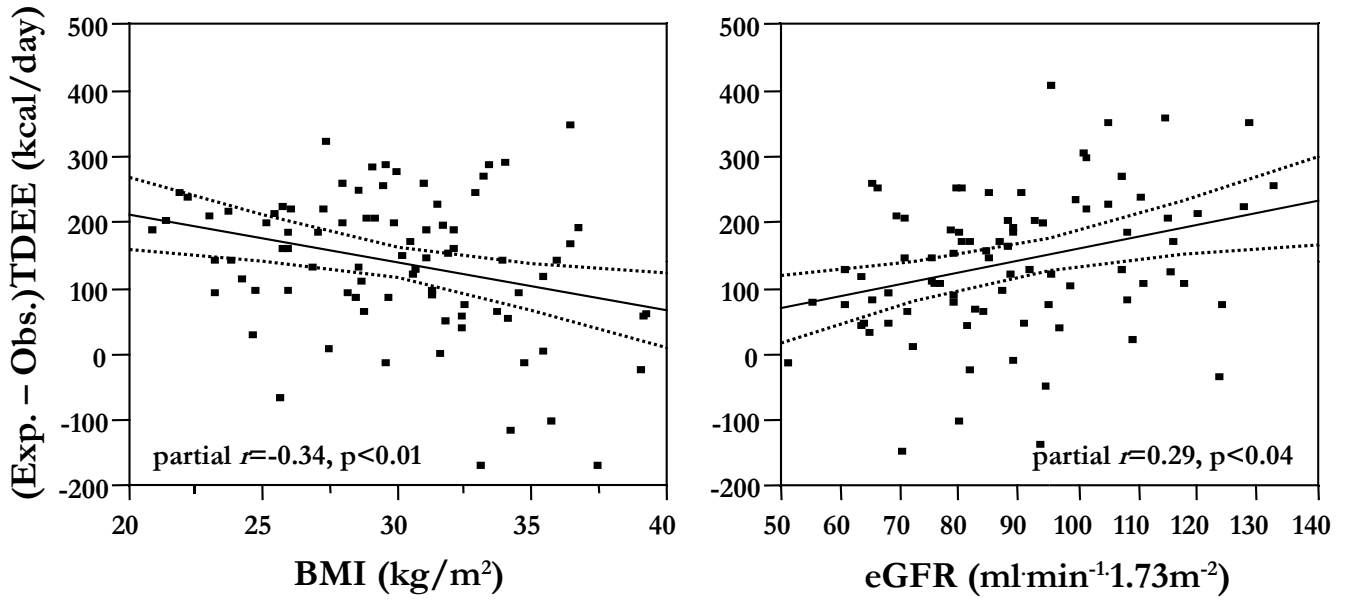

Supplement: supp_dc15-0355v150355_DC150355SupplementaryData.pdf [file supp_dc15-0355v150355_DC150355SupplementaryData.pdf]
